24 Department of Neurology  
25 School of Medicine  
26 Johns Hopkins University  
27 Pathology 2-210  
28 600 N. Wolfe St.  
29 Baltimore, MD 21287 USA  
30 Email: [jing.xu@jhmi.edu](mailto:jing.xu@jhmi.edu)

31

32 **Number of figures: 6**

33 **Number of tables: 2**

34 **Number of words:**

35 Abstract: 197 (limit 250)

36 Introduction: 603 (limit 650)

37 Discussion: 1360 (limit 1500)

38

39 **Acknowledgement**

40 We thank Adrian Haith and Martin Lindquist for helpful discussions about data analysis.

41 This main study was supported by James S. McDonnell Foundation JMSF 220020220.

42 Additional support came from a Scholar Award from the James S. McDonnell

43 Foundation and a Grant from the Wellcome Trust (094874/Z/10/Z) to Jörn Diedrichsen.

44 Andreas R. Luft is supported by the P&K Pühringer Foundation.

45

46

## Abstract

47 Loss of hand function after stroke is a major cause of long-term disability. Hand function  
48 can be partitioned into strength and independent control of fingers (individuation). Here  
49 we developed a novel paradigm, which independently quantifies these two aspects of  
50 hand function, to track hand recovery in 54 patients with hemiparesis over the first year  
51 after their stroke. Most recovery of both strength and individuation occurred in the first  
52 three months after stroke. Improvement in strength and individuation were tightly  
53 correlated up to a strength level of approximately 60% of the unaffected side. Beyond  
54 this threshold, further gains in strength were not accompanied by improvements in  
55 individuation. Any observed improvements in individuation beyond the 60% threshold  
56 were attributable instead to a second independent stable factor. Lesion analysis revealed  
57 that damage to the hand area in motor cortex and the corticospinal tract (CST) correlated  
58 more with individuation than with strength. CST involvement correlated with  
59 individuation even after factoring out the strength-individuation correlation. The most  
60 parsimonious explanation for these behavioral and lesion-based findings is that most  
61 strength recovery, along with some individuation, can be attributed to descending  
62 systems other than the CST, whereas further recovery of individuation is CST dependent.

63

### 64 **Keywords:**

65 Finger individuation, strength, stroke, motor recovery, plasticity

66

67

## Introduction

68 Human hand function comprises at least two complementary aspects: strength as  
69 manifest in a power grip, and control of individual finger movements as in piano playing.  
70 The most common observation after stroke is that both are impaired (Kamper and Rymer,  
71 2001; Lang and Schieber, 2003). Weakness presents as difficulties in voluntarily opening  
72 of the hand, extending the wrist and fingers against resistance, and producing a strong  
73 grip (Colebatch and Gandevia, 1989; Kamper *et al.*, 2003). Loss of finger control  
74 manifests as inability to either move a single finger while keeping the others immobile, or  
75 to make complex hand gestures, both of which impair the ability to perform tasks such as  
76 typing or buttoning a shirt (Kamper and Rymer, 2001; Li *et al.*, 2003; Lang and Schieber,  
77 2004). When strength does recover after stroke, control often remains impaired, causing  
78 lasting disability (Heller *et al.*, 1987; Sunderland *et al.*, 1989). However, the relationship  
79 between strength and control after stroke remains poorly understood. Separating the  
80 effect of stroke on finger strength versus control is a challenge given that most current  
81 clinical measurements conflate weakness with deficits in control. In the current study we  
82 therefore sought to develop a new paradigm that could measure these two aspects of hand  
83 function separately, and to investigate the relationship between strength and control over  
84 the time course of hand recovery after stroke. We were specifically interested to test  
85 whether these two components recover in a lawful relationship with each other, or  
86 whether they recover independently.

87 Existing behavioral tasks used to assess hand function after stroke, such as the  
88 Fugl-Meyer Assessment (FMA) (Fugl-Meyer *et al.*, 1975), the Nine-Hole Peg Task  
89 (9NPT) (Sharpless, 1982), and the Action Reach Arm Test (ARAT) (Lyden and Lau,



1991), are not designed to separate deficits in strength and control. To isolate these two aspects of hand function it is necessary to remove any obligatory relationship between them (Reinkensmeyer *et al.*, 1992), i.e. derive a control measure that is independent of strength. Intuitively, a rock climber may have stronger fingers than a pianist, but not necessarily superior control of individual fingers.

Schieber (1991) devised an individuation task that requires participants to move individual fingers while keeping the non-moving ones stationary. Movements of the passive fingers were used as a measure of loss of control. This paradigm however does not directly track the force relationship between active and passive fingers. In the paradigm used here, we first measured the maximum voluntary contraction force (MVF) that a participant could produce with each finger. We then asked participants to produce isometric forces over four sub-maximal levels with each finger, while keeping the passive fingers immobile. Even controls show involuntary force production (enslaving) on the passive fingers, which increases with the required active force level (Li *et al.*, 1998; Zatsiorsky *et al.*, 2000). The slope of the function of passive finger enslaving on active force thus provides a measure of individuation that is independent of strength.

Using this paradigm we tracked the recovery of hand strength and finger individuation in patients over a one-year period after stroke. One possibility is that strength and control recover independently. For example, a patient may remain quite weak but have good recovery of individuation, or a patient may recover a significant amount of grip strength but fail to individuate the digits. Alternatively, recovery may be such that when strength recovers so does individuation, because either they share a common neural substrate or repair processes are proceeding in parallel in separate neural

113 substrates. Finally, lesion analysis allowed us to investigate whether there is any  
114 identifiable anatomical basis for any observed dissociation between strength and control  
115 deficits.

116

## 117 **Materials and Methods**

### 118 *Participants*

119 Fifty-four patients with first-time ischemic stroke and hemiparesis (34 male, 20  
120 female; mean age  $57.4 \pm 14.9$  years) were recruited from three centers: The Johns Hopkins  
121 Hospital and Affiliates, Columbia University Medical Center, and The University  
122 Hospital of Zurich and Cereneo Center for Neurology and Rehabilitation. According to  
123 the Edinburgh Handedness Inventory (Oldfield, 1971), Forty-four patients were right-  
124 and 10 were left-handed. All patients met the following inclusion criteria: 1) First-ever  
125 clinical ischemic stroke with a positive DWI lesion within the previous 2 weeks; 2) One-  
126 sided upper extremity weakness (MRC < 5); 3) Ability to give informed consent and  
127 understand the tasks involved. We excluded patients with one or more of the following  
128 criteria: initial UE FMA > 63/66, age under 21 years, hemorrhagic stroke, space-  
129 occupying hemorrhagic transformation, bihemispheric stroke, traumatic brain injury,  
130 encephalopathy due to major non-stroke medical illness, global inattention, large visual  
131 field cut (greater than a quadrantanopia), receptive aphasia (inability to follow 3-step  
132 commands), inability to give informed consent, major neurological or psychiatric illness  
133 that could confound performance/recovery, or a physical or other neurological condition  
134 that would interfere with arm, wrist, or hand function recovery. Due to the exclusion of  
135 aphasic patients, the sample had a bias towards right-sided infarcts (17 left-sided, 37

136 right-sided; for detailed patient characteristics, see Table 1). The lesion distribution is  
137 shown in Fig. 5A.

138 We also recruited 14 age-matched healthy control participants (10 male, 4  
139 female; mean age  $64 \pm 8.2$  years; all right-handed) at the three centers. There was no age  
140 difference between the patient and control samples (two-samples t-test  $t(65) = 1.60$ ,  $p =$   
141  $0.11$ ), nor did the ratio of gender and handedness in the two groups differ (Fisher's exact  
142 test yielded results of  $p = 0.11$  and  $0.75$ , respectively). The healthy controls did not have  
143 any neurological disorder or physical deficit involving the upper limbs. All participants  
144 signed a written consent, and all procedures were approved by Institutional Research  
145 Board at each study center.

146

#### 147 *Assessment of finger maximum voluntary contraction and of individuation*

148 To achieve good characterization of hand function recovery, the study design  
149 required patient testing at the following five time points post-stroke: within the first 2  
150 weeks (W1,  $10 \pm 4$  days), at 4-6 weeks (W4,  $37 \pm 8$  days), 12-14 weeks (W12,  $95 \pm 10$  days),  
151 24-26 weeks (W24,  $187 \pm 12$  days), and 52-54 weeks (W52,  $370 \pm 9$  days). Healthy controls  
152 were tested at comparable intervals.

153 At each of the five visits, hand function was tested using an ergonomic device that  
154 measures isometric forces produced by each finger (Fig. 1A). The hand-shaped keyboard  
155 was comprised of ten keys. Force transducers (FSG-15N1A, Honeywell®; dynamic range  
156 0-50 N) measured the force exerted by each finger with a sampling rate of 200 Hz. The  
157 data were digitized using National Instrument USB-621x devices interfacing with  
158 MATLAB (The MathWorks, Inc., Natick, MA) Data Acquisition Toolbox. Visual stimuli

159 of the task were presented on the computer monitor, run by custom-written software  
160 using the Psychophysics Toolbox (Psychtoolbox) in MATLAB environment (Brainard,  
161 1997).

162 Participants were seated in a comfortable chair, facing the computer monitor.  
163 During the entire procedure, participants rested their two hands on the keyboards with  
164 each finger on top of a key, their wrists were strapped and fixed on a wrist-rest, and their  
165 forearms extended and supported by foam arm rests. Throughout the experiment, ten  
166 vertical gray bars representing the ten digits appeared on top of the screen, and another  
167 ten vertical bars below them instructed the amount of force to be exerted; the required  
168 force level for each finger in each trial was indicated by the height of green filling the  
169 vertical gray bar (Fig. 1B). Participants could monitor the force exerted by all ten digits  
170 in real time by the heights of ten small white horizontal lines moving along the vertical  
171 force bars.

172 Two separate aspects of finger function were tested: maximal voluntary  
173 contraction force (MVF) and individuation. During each MVF trial, participants were  
174 asked to depress one finger at a time with its maximum strength, and maintain the force  
175 level for two seconds. The participants could press with the other fingers as much as they  
176 wanted as long as maximal force on the instructed finger was achieved. To signal the  
177 start, one force bar corresponding to the instructed finger turned to green. MVF was  
178 measured twice per digit.

179 In the individuation task, participants had to press each individual finger at a sub-  
180 MVF level of force, while at the same time keeping their other fingers immobile on the  
181 keys. Four target force levels were tested for each digit: 20%, 40%, 60%, and 80% of

182 MVF, and each level was repeated 4 times. On each trial, a section of a force bar  
183 corresponding to the finger to be depressed turned to green, with the height of the middle  
184 black line representing the target force level and the green region around the middle line  
185 representing the 25% upper and lower bounds around the target force level (Fig. 1B). The  
186 participants were asked to bring the corresponding white line up to the force target line,  
187 and maintain the force level for 0.5 sec. If no response passing the force threshold of 2.5  
188 N was detected within two seconds, the trial was terminated.

189 -----  
190 Insert Figure 1  
191 -----

192

### 193 ***Data analysis***

194 *Strength Index.* The 95th percentile of the force traces produced across all the  
195 sampled force data points during the finger depressing period in each trial was calculated,  
196 and then averaged across the two MVF trials to obtain a measure of MVF for each digit.  
197 If the force achieved on one of the two trials was below 60% of the force produced on the  
198 other trial, only the larger force was taken as MVF measure (6.5% of the trials were  
199 excluded). The overall strength of the hand was then calculated by averaging across all  
200 five digits. To account for the large inter-subject variability in pre-morbid strength, all  
201 MVF values were normalized by MVF of the non-paretic hand at W52; estimated using a  
202 mixed-effects model (see below). This normalization provided a Strength Index, with a  
203 value close to 1 implying full recovery. For control participants, one of the hands was  
204 randomly assigned to take the role as the “non-paretic” hand for normalization purposes.

205 To account for possible laterality effects, the assignment followed the ratio of dominant  
206 to non-dominant hands found in the patients (~10:4).

207 *Individuation Index.* If individuation was perfect, a participant should be able to  
208 press the instructed finger without any force being exerted by the passive fingers. For  
209 each time bin  $t$  (5ms) in a single trial, we calculated the enslaved deviation of the force of  
210 each passive finger ( $F_{t,j}$ ) from baseline force ( $BF_j$ ), which was assessed at the beginning  
211 of the trial when a go cue was presented. This deviation was averaged over all bins ( $T$ ) in  
212 the force trace from the go cue to the end of the trial:

$$213 \quad meanDevP = \frac{1}{T} \sum_{t=0}^T \sqrt{\sum_{j=passive} (F_{t,j} - BF_j)^2} \quad (1)$$

214 where the index  $j$  denotes the  $j$ th passive finger. A higher *mean deviation* indicates more  
215 enslaving of the passive finger.

216 For a measure of individuation ability, it is necessary to account for the  
217 relationship between the force deviations of the passive fingers to the force produced by  
218 the active finger. Consistent with previous reports (Li *et al.*, 1998), we observed that  
219 enslaving of passive fingers increases with higher active force (Fig. 1E). The relationship  
220 between the two variables was close to linear. Thus a good measure of individuation is  
221 how much the mean deviation in passive fingers increases for each  $N$  of force produced  
222 by the active finger. The ratio of these two variables can be reliably estimated by fitting a  
223 regression line without an intercept. To reduce the influence of outliers, we used robust  
224 regression (Holland and Welsch, 1977). The *slope* of the regression line reflects  
225 individuation ability: The smaller the slope, the better the individuation ability, with the  
226 best case being 0, which means keeping the passive fingers perfectly immobile at any  
227 active force level. Because the regression slope is bounded by zero (as mean deviation is

228 positive), its distribution is positively skewed. To allow for the use of parametric  
229 statistics the slope was log-transformed. The sign of this value was inverted, so that  
230 higher values would correspond to better function. The negative log slope was calculated  
231 separately for each active finger and then averaged across fingers, giving the  
232 Individuation Index for the hand. As was done for the Strength Index, the Individuation  
233 Index was normalized by each participant's "non-paretic" (randomly assigned for healthy  
234 controls) hand's W52 value as estimated by mixed-effect model to provide the final  
235 Individuation Index for each hand.

236 *Reliability measures for Strength and Individuation.* To determine the reliability  
237 of the Strength and Individuation Indices, split-half reliabilities for both measures were  
238 calculated. For the Strength Index, we used one MVF trial per digit in each split. We then  
239 calculated the (normalized) Strength Index on each half of the data independently in the  
240 same way as for the full data set. The correlation between the two halves across all  
241 available sessions and patients was then used as a measure of split-half reliability.

242 For the Individuation Index, data from each finger was split such that two trials  
243 per force level were assigned to each split. The slope of the regression line and  
244 Individuation Index was then calculated separately for each split, and normalized in the  
245 same way as MVF. We repeated the split multiple times, each time assigning trials at  
246 random and then averaging the split-half correlations from all splits for more reliable  
247 results.

248 Split-half correlation will underestimate reliability because the variability in each  
249 half will be higher than the variability when using all the data (Guttman, 1945). The  
250 estimate was therefore corrected using the formula

251 
$$r_{full} = \frac{2r_p}{r_p + 1} \quad (1)$$

252 where  $r_p$  is the correlation between the two splits.

253 *Stability analysis.* To assess whether the relative deficits in strength and  
254 individuation remained stable across different testing time points, or whether there was  
255 meaningful biological change, we calculated the correlation of each measure across  
256 neighboring testing time points. One caution when interpreting these correlations is that  
257 the correlation between two repeated measures will always be smaller than 1 even if the  
258 underlying factor did not change. This is because both measures contain some  
259 measurement noise. To account for this effect, we used the reliability ( $r_{full}$ ) of the measure  
260 at each time point to compute a noise ceiling, which indicates how much two repeated  
261 noisy measurements should correlate with each other if the underlying variable were  
262 perfectly stable:

263 
$$r_{noise\ ceiling} = \sqrt{r_{full}^1 * r_{full}^2} . \quad (2)$$

264 *Statistical analysis and handling of missing data.* Data analysis was performed  
265 using custom-written MATLAB and R (R Core Team, 2012) routines. The analysis  
266 focused on the Strength and Individuation Indices, but was also performed on standard  
267 clinical assessments, FMA, ARAT, and Dynamometry strength measures.

268 The requirement for 5 post-stroke time-points was ambitious, with the  
269 consequence of some missing sessions. A total of 21 patients completed all five time-  
270 points; on average each patient completed 3.6 sessions; thus a total of 75% of the possible  
271 sessions were acquired. To optimally use all the measured data, we employed linear  
272 mixed-effect models. The model specifies joint distributions for observed and missing



273 observations – then the parameters of those distributions can be estimated by maximizing  
274 the likelihood of the data under the model. There are several advantages to this approach.  
275 First, all the available data can be used and there is no need to exclude any data.  
276 Secondly, it avoids the statistical pitfalls inherent in “filling in” missing observations  
277 with point estimates. Linear mixed-effect models implemented in the *lme4* package in R  
278 (Bates *et al.*, 2014) were used to test the changes in these measures over time. Participant  
279 was taken as a random factor. Time Point (five time points from W1-W52) and Hand  
280 Condition (paretic, non-paretic, and control) were considered fixed factor. The model was  
281 applied to control and patient data separately. Mixed-effect model estimation for group  
282 summary statistics was implemented in MATLAB using the restricted maximum  
283 likelihood method (Laird and Ware, 1982).

284 *Modeling the time-invariant function.* To test the hypothesis that there is time-  
285 invariant relationship between strength and individuation, a two-segment piecewise linear  
286 function was fitted. This function had four free parameters: the intercept, the location of  
287 the inflection point, and the slope on each side of the inflection point. Let  $x$  be the  
288 predictor with two segments separated by a constant breakpoint  $c$ ,  $x_1 \leq c$  and  $x_2 \geq c$ . The  
289 linear functions for each segment are

$$\begin{aligned} y_{1i} &= b_{10} + b_{11}x_{1i} + e_{1i} \\ y_{2i} &= b_{20} + b_{21}x_{2i} + e_{2i} \end{aligned} \quad (3)$$

291 The two pieces can be joined at the breakpoint constant  $c$  by setting  $y_{1i} = y_{2i}$ , yielding

$$\begin{aligned} b_{20} &= b_{10} + (b_{11} - b_{21})c \\ y_{2i} &= b_{10} + (b_{11} - b_{21})c + b_{21}x_{2i} + e_{2i} \end{aligned} \quad (4)$$

293 Putting the two pieces together, we have the full model

294 
$$y_i = a + b_1 x_i \cdot I(x_i \leq c) + [(b_1 - b_2)c + b_2 x_i] \cdot I(x_i \geq c) + e_i \quad (5)$$

295

296 where  $I(\cdot)$  is an indicator variable, coded as 1's or 0's to indicate the condition satisfied.

297 The maximum-likelihood (or least-squares) estimates of these parameters were  
298 obtained by using the non-linear optimization routine `fminsearch` in Matlab. Leave-one-  
299 out cross-validation (Picard and Cook, 1984) was used to evaluate whether this function  
300 changed systematically over time, or whether it was time-invariant. The time-invariant  
301 model with fixed parameters across all time points was compared with a more complex  
302 model that allowed free parameters for each time point. Cross validation provides an  
303 unbiased estimate of a model's ability to predict new data and automatically penalizes  
304 models that are too complex.

305

### 306 ***Lesion Imaging and Quantification***

307 *Imaging acquisition and lesion distribution.* Images were acquired using 3T MRI  
308 Phillips scanner and consisted of two DTI datasets (TR/TE=6600/70ms, EPI, 32 gradient  
309 directions,  $b=700$  s/mm<sup>2</sup>), and an MPRAGE T1-WI (TR/TE=8/3.8ms) sequence. FOV,  
310 matrix, number of slices, and slice thickness were 212×212 mm, 96×96 (zero-filled to  
311 256x256), 60, 2.2mm, respectively, for DTI; and 256×256mm, 256×256, 170, 1.2mm,  
312 respectively, for T1-WI. The DTI were processed using DtiStudio ([www.MRISstudio.org](http://www.MRISstudio.org))  
313 and the mean diffusion-weighted image (DWI) was calculated.

314 To define the boundary(s) of the acute stroke lesion(s) for each participant, a  
315 threshold of >30% intensity increase from the unaffected area in the first-time-point  
316 diffusion-weighted image (DWI) extracted from DTI images was applied. A

317 neuroradiologist (AVF), blind to the patients' clinical information, manually modified the  
318 boundary to avoid false-positive and false-negative areas on RoiEditor  
319 ([www.MRIstudio.org](http://www.MRIstudio.org)). The definitions were double checked by a second rater (MB). The  
320 averaged lesion distribution map across all patients in the current study is shown in Fig.  
321 5A. For the seven patients who had no DTI in the acute phase, lesion definition was  
322 performed on the clinical DWI, which has lower resolution (1x1mm in plane, 4-6mm  
323 thickness). Analysis of white matter ROIs, including the CST, was not performed in  
324 patients.

325 *Region of interest definition and lesion quantification.* The focus was on two  
326 ROIs: 1) The cortical gray matter of the hand area in the motor cortex; 2) The entire CST  
327 superior to pyramids, identified by probabilistic maps derived from tract tracing methods  
328 (see below). The percentage volume affected in these regions was correlated with our  
329 main outcome measures, the Strength and Individuation Indices.

330 To defined the CST, each image and respective lesion were mapped to a single  
331 subject adult template, the JHU-MNI atlas (Mori *et al.*, 2008; Oishi *et al.*, 2008, 2009,  
332 2010), using affine transformation followed by dual channel (both b0 and FA maps) large  
333 deformation diffeomorphic metric mapping (LDDMM) (Ceritoglu *et al.*, 2009). This  
334 template has already been segmented into more than 200 regions of interest (ROIs), and  
335 contains probabilistic maps of multiple tracts, including the CST (Zhang *et al.*, 2010). To  
336 ensure accurate mapping, we first used "artificial" images, in which the stroke area was  
337 masked out and substituted by the normal images from the contralateral hemisphere. This  
338 helped to minimize inaccuracies caused by the focal changes in intensity due to the  
339 stroke. The white matter beneath the cortex was identified with a FA-threshold of 0.25.

340 The segmentation defined in the template, as well as a probabilistic map of the CST, were  
341 then “back-warped” by each subject's deformation field to generate individualized  
342 parcellations.

343 A different approach was used to define an ROI that would encompass the hand  
344 area of the primary motor cortex. The hand ROI was defined on the average  
345 reconstruction of the cortical surface available in the Freesurfer software (Dale *et al.*,  
346 1999), selecting Brodmann area (BA) 4 based on cytoarchitectonic maps (Fischl *et al.*,  
347 2008). To restrict the ROI to the area of motor cortex involved in the control of the upper  
348 limb, we only included the area 2.5 cm dorsal and ventral of the hand knob (Yousry *et*  
349 *al.*, 1997). The defined ROI was then morphed into MNI space using the surfaces of the  
350 age-matched controls. These ROIs were then brought to the JHU-MNI atlas (in which  
351 each subject and respective stroke area were already mapped, as mentioned above) using  
352 T1-based LDDMM to construct a probabilistic map of the hand area. The probabilistic  
353 map was threshold of 70% to calculate percent-volume affected.

354

### 355 ***Clinical assessments***

356 At each visit, all participants were also assessed with several clinical outcome  
357 measures. Here we report data for FMA and ARAT. Grip strength was assessed with a  
358 Jamar hydraulic hand dynamometer (Sammons Preston, Rolyan, Bolingbrook, IL, USA).  
359 Strength in the first dorsal interosseous (FDI) and the flexor carpi radialis (FCR) muscles  
360 was assessed using a hand-held dynamometer (Hoggan MiroFET2 Muscle Tester, Model  
361 7477, Pro Med Products, Atlanta, GA, USA).

362

363

## Results

364

365

366

367

368

369

370

371

372 ***The Strength and Individuation Indices were reliable.***

373

374

375

376

377

378

379

380

381

382

383

384

385

A total of 54 patients with acute stroke and 14 healthy controls underwent five testing sessions over a one-year period. Data in the final analysis comprised a total of 251 sessions tested in 53 patients (one patient only completed two blocks of the task, and was thus removed from further analysis) and 14 controls. Forty-one patients and twelve controls completed  $\geq 3$  sessions. The data were 75% complete, with 25% of the sessions were missing or unusable. Non-tested sessions were treated as data missing at random and all available data were used in the statistical analysis (see Materials and Methods).

Finger strength was assessed by measuring the maximum voluntary force (MVF) for each finger separately and then averaged across all fingers for each hand. MVF for healthy controls had an average value of 20.35 N (SD = 8.56) for the dominant hand, and 22.76 N (SD = 6.89) for the non-dominant hand. The normalized Strength Index for the controls' dominant hand was 1.00 (SD = 0.19), and non-dominant hand was 1.17 (SD = 0.25). For patients, the mean for the non-paretic hand was 0.93 (SD = 0.20), and for the paretic hand it was 0.59 (SD = 0.38). For the paretic hand, Strength Indices did not correlate with age ( $r = 0.04$ ,  $p = 0.75$ ), nor were they affected by gender ( $t(51) = 0.98$ ,  $p = 0.33$ ) or handedness ( $t(51) = 0.10$ ,  $p = 0.92$ ).

To assess individuation, we measured the amount of involuntary force changes (enslaving) on the passive fingers for different levels of force production with the active fingers. The amount of enslaving systematically increased at higher force levels (Fig. 1E). Loss of control at increasing force levels has been shown for the angular position of

386 the fingers (Li *et al.*, 1998) and the reaching radius of the arm after stroke (Sukal *et al.*,  
387 2007; Ellis *et al.*, 2009). To control for this relationship, we characterized the  
388 Individuation Index as the slope of the function between active force and passive  
389 enslaving. Lower values of Individuation Index indicate more impaired individuation.  
390 Healthy, age-matched controls showed, on average, a normalized Individuation Index of  
391 1.00 (SD = 0.18). This refers to a slope of 0.087 (SD = 0.046), meaning that for a finger  
392 press of 10N the mean deviation of the passive fingers was 0.69N. As was the case for  
393 Strength, Individuation Indices in the paretic hand were not correlated with age ( $r = 0.16$ ,  
394  $p = 0.26$ ), nor affected by gender ( $t(51) = 0.17$ ,  $p = 0.86$ ) or handedness ( $t(51) = 0.34$ ,  $p =$   
395 0.74).

396         When introducing a new instrument, it is important to first establish its reliability,  
397 i.e., the accuracy with which true differences between subjects and changes within  
398 subject can be determined. We therefore split the data for each session in half, calculated  
399 Strength and Individuation Indices on these two independent data sets, and correlated the  
400 resultant scores across patients and sessions (see methods). The adjusted split-half  
401 reliability across all patients and weeks for the Strength Index was  $r_{full} = 0.99$  and 0.94  
402 for the paretic and non-paretic hands respectively, and  $r_{full} = 0.89$  for controls, which  
403 indicates good reliability. The adjusted split-half reliability of the Individuation Index of  
404 all patients was  $r_{full} = 0.99$  and 0.93 for the paretic and non-paretic hands respectively,  
405 and for controls was  $r_{full} = 0.97$ .

406         Consistent with our effort to construct an individuation measure that is  
407 independent of strength, the overall correlation between Individuation and Strength in

408 controls was very low for both controls ( $r = -0.19, p = 0.51$ ), and for patients' non-paretic  
409 hand ( $r = 0.17, p = 0.21$ ).

410

411 ***The Strength and Individuation indices correlated with standard clinical measures.***

412 The Strength and Individuation Indices were compared with existing clinical measures:  
413 the Fugl-Meyer (a measure of impairment) and ARAT (a measure of activity) Table 2  
414 shows the correlations for all four measures obtained from the paretic hand across all  
415 time points. Overall, all correlations were very high ( $\max p = 1.21 \times 10^{-26}$ ), indicating that  
416 all the measures could detect severity of the hand function deficit. The correlation in the  
417 patients between the two clinical measures was 0.91, whereas the correlation between the  
418 Strength and Individuation Indices was 0.73, a significant difference ( $z = 5.62, p =$   
419  $2.0 \times 10^{-8}$ , using z-test with  $N = 180$  (Fisher, 1921)). Given comparable reliabilities for all  
420 measures, this difference unlikely results from measurement noise – rather it suggests  
421 that our Strength and Individuation Indices measure two different aspects of the hand  
422 function, whereas the clinical scales tend to capture a mixture of strength and control.  
423

424 ***Recovery of strength and individuation occurred mainly in the first three months after***  
425 ***stroke.***

426 We first examined the time courses of recovery for strength and individuation in  
427 the paretic hand. If the two observed variables change in parallel, their recovery may or  
428 may not be mediated by the same underlying process. A difference in the time courses,  
429 however, would provide a strong hint of separate recovery processes for strength and  
430 individuation.

431 For both measures, most of the recovery appeared to occur within the first 12  
432 weeks after stroke (Fig. 2A-B). A model with a fixed effect of Week and a random effect  
433 of Subject was built to evaluate this statistically. An effect of Week was tested with a  
434 likelihood ratio test against the null model with the random effect only. Results indicate  
435 that both the Strength and Individuation Indices significantly improved over time  
436 (Strength:  $\chi^2 = 47.65$ ,  $p = 5.10 \times 10^{-12}$ ; Individuation:  $\chi^2 = 18.58$ ,  $p = 1.63 \times 10^{-5}$ ). Paired *t*-  
437 tests between adjacent time points showed significant improvement (after Bonferroni  
438 correction) of the Strength Index up to week 12; whereas the Individuation Index only  
439 showed a significant improvement between weeks 4-12 (see detailed statistics in Fig. 2A-  
440 B). A similar recovery curve was found for the standard clinical measures of motor  
441 function (detailed statistics in Fig. 3).

442 To directly compare the time courses of between the two indices at the early stage  
443 of recovery, we *z*-normalized scores of the two variables and then investigated the change  
444 in the scores for the time intervals W1-4 vs. W4-12 (Fig. 2C). This analysis suggests that  
445 strength may recover mostly in the first four weeks, while individuation recovery may  
446 occur equally in both time periods. Repeated-measures ANOVA over *z*-scores for  
447 Strength and Individuation Indices during the two time intervals yielded a significant  
448 interaction ( $F(1,25) = 6.82$ ,  $p = 0.015$ , Fig. 2C). Thus, despite overall similarity, there  
449 was a significant difference in the time courses of recovery of strength and individuation,  
450 with strength showing faster early recovery.

451 That most improvement in both strength and individuation occurred over the first  
452 12 weeks is also apparent in the correlations between adjacent testing time points for each  
453 variable across individuals (Fig. 2D). The correlation between weeks 1 and 4 for the



454 Individuation Index was significantly lower than it was for subsequent time points (W1-4  
455 vs. W24-52:  $z = -4.23, p = 0.000023$ ), and this difference for Strength Index was  
456 marginally significant ( $z = -1.83, p = 0.067$ ), using  $z$ -test with  $N = 28$  and  $33$  (Fisher,  
457 1921). Thus, the position of the patients on the mean recovery curve changed more  
458 during the first 4 weeks than in the last 6 months. This correlation difference cannot be  
459 attributed to measurement noise, as both measures had stable reliabilities at all time  
460 points (dashed line). Instead, the lack of stability of these measures during early recovery  
461 is indicative of meaningful biological change.

462

-----

463

Insert Figure 2

464

-----

465 Consistent with previous findings (Noskin *et al.*, 2008), the non-paretic hand also  
466 showed mild impairment in the first month after stroke. A likelihood ratio test of the  
467 mixed-effect model showed a significant effect of Week for Strength ( $\chi^2 = 7.86, p =$   
468  $0.0051$ ), and a more subtle effect for Individuation ( $\chi^2 = 4.12, p = 0.042$ ) (Fig. 2A-B).  
469 This increase in performance is unlikely to be related to a general practice effect, because  
470 the Strength Index in healthy controls decreased slightly over time ( $\chi^2 = 4.54, p = 0.033$ ),  
471 perhaps due to reduced effort, whereas the Individuation Index for healthy controls was  
472 maintained at a similar level over the whole year ( $\chi^2 = 0.33, p = 0.56$ ).

473

-----

474

Insert Figure 3

475

-----

476 In summary, most recovery of both strength and individuation occurred in the first  
477 three months after stroke, with stabilization of recovery around 3-6 months. The data also  
478 suggest a slight difference in the time course, with strength recovering faster than  
479 individuation in the first month.

480

481 ***Evidence for a time-invariant relationship between strength and control.***

482 The time course analysis only provides weak evidence for partial independence of  
483 the recovery processes for strength and individuation. Therefore we undertook a closer  
484 examination of the relationship between the two variables at each testing time-point (Fig.  
485 4A). Although patients tended to move from the lower left corner to the upper right  
486 corner of this space over the time course of recovery, the overall shape of the strength-  
487 individuation impairment relationship seemed to be remarkably preserved across weeks.  
488 At lower strength levels, there was a clear correlation between strength and individuation;  
489 whereas once above ~60% of normal strength level, the two variables were unrelated,  
490 producing a distinct curvilinear shape for the overall function (Fig. 4B).

491 To formally test the time invariance suggested by visual inspection, we first found  
492 a function to describe the strength-individuation relationship. We used data from all time  
493 points and evaluated the goodness of fit of a piecewise function with two linear segments  
494 connected at an inflection point, using leave-one-out cross-validation (see Materials and  
495 Methods). Cross-validation automatically penalizes models that are too complex. This  
496 functional form gave us a good fit to the data (cross-validated  $R^2 = 0.53$ , Fig. 4B). We  
497 also explored first- to fourth- order polynomial functions. All four models resulted in a  
498 worse fit (cross-validated  $R^2 < 0.49$ ) than the piece-wise linear function.

499 We then tested for “time-invariance” of this strength-control relationship, that is,  
500 whether the function shape changed across weeks. Again, using leave-one-out cross-  
501 validation, the time-invariant model with fixed parameters across all weeks was  
502 compared with a model that allowed the parameters to change for each week (time-  
503 varying model). The cross-validated  $R^2$  for the time-varying two-segment piecewise  
504 linear function was 0.45, a worse fit than the time-invariant model.

505 These results suggest that there is a time-invariant recovery relationship between  
506 strength and individuation after stroke, which consists of two parts: up to a certain level  
507 of strength (60.7% of non-paretic hand), the Strength and Individuation Indices are  
508 strongly correlated ( $r = 0.74$ ,  $p = 6.61 \times 10^{-18}$ ); after strength exceeds this threshold, the  
509 two variables are no longer correlated ( $r = -0.17$ ,  $p = 0.11$ ; Fig 4B). This lack of  
510 correlation cannot be attributed to a ceiling effect for the Individuation Index, because for  
511 both patients and controls there was still a considerable variability, and the reliability of  
512 Individuation Index was very high. This indicates that our measure has enough dynamic  
513 range and sensitivity to detect inter-individual differences even in the healthy population.

514 -----

515 Insert Figure 4

516 -----

517 Overall, our results suggest that recovery can be captured as traversal along a  
518 time-invariant function relating strength and individuation. Differences in recovery arise  
519 because patients vary substantially in the distance they move along this function: some  
520 patients with initial severe impairment made a good recovery, moving past the inflection  
521 point of 60.7% strength (exemplified by the yellow dot in Fig. 4A). Other severely

522 impaired patients failed to reach the inflection point (red dot in Fig. 4A). Finally, some  
523 mildly impaired patients started off beyond the inflection point and showed a good range  
524 of individuation capacity.

525

526 *A second process contributed additional recovery of finger individuation.*

527         The fact that recovery of both strength and individuation could be captured by a  
528 single time-invariant function that relates them is compatible with the hypothesis of a  
529 single underlying process that drives recovery of both aspects of hand function. It is  
530 possible, however, that an additional process injects further recovery, which determines a  
531 patient's position relative to the mean recovery function in strength-individuation space.  
532 If such a process exists, a given patient should occupy a consistent position above or  
533 below the mean recovery function across time points.

534         To test this hypothesis we investigated the residuals of the Individuation Index for  
535 each patient at each time point after subtracting out the mean two-segment piecewise-  
536 linear recovery function. If the variability around this mean function were purely due to  
537 noise, we should observe no consistent week-by-week correlation between residuals for  
538 each patient. Alternatively, if the residuals were to be correlated across weeks, it would  
539 indicate that some patients were consistently better at individuation than that predicted  
540 from the function, and others were consistently worse, suggesting an additional factor  
541 mediating individuation recovery (black arrows in Fig. 6).

542 Correlations of residuals from adjacent time points across patients were initially quite  
543 low. However, from week 4 onwards, most patients' distances from the mean function  
544 remained stable (Fig. 4C-D). This consistent structure in residuals provides evidence for

545 an extra factor contributing to recovery of individuation. The consistent pattern of  
546 residuals at later time points could not be attributed to pre-morbid inter-individual  
547 differences, because both the Strength and Individuation Indices were normalized to the  
548 non-paretic hand. The low week-by-week correlations between early time points argues  
549 that the later correlations do not simply reflect sparing of a particular neural system after  
550 the stroke. If this had been true, the correlation between the Individuation residuals  
551 should have remained constant across all time points. Furthermore, the lower early  
552 correlation cannot be attributed to measurement noise, as reliabilities for the early  
553 measurement points were high (Fig. 4D). Rather, the initially low but then increasing  
554 correlation indicates an additional recovery process operating above the lower bound of  
555 the strength-individuation function (Fig. 6). This process is mostly active in the first three  
556 months after stroke and determines how well individuation recovers above that expected  
557 from the time-invariant recovery function.

558

559 ***Lesions involving motor cortex and the corticospinal tract correlated more with***  
560 ***individuation than strength.***

561 To investigate the underlying neural substrates of recovery processes, we  
562 correlated the location and size of the lesion with the Strength and Individuation Indices.  
563 We were especially interested in the particular role of the corticospinal tract (CST).

564 While both corticospinal and corticoreticular projections originate in part from the  
565 precentral gyrus and are intermingled to some degree, cortical projections to the reticular  
566 formation have a more widespread bilateral origin from other pre-motor areas (Keizer  
567 and Kuypers, 1989), whereas direct corticospinal projections to ventral horn neurons

568 primarily arise from the anterior bank of the precentral gyrus/central sulcus, i.e. “new  
569 M1” (Rathelot and Strick, 2009; Witham *et al.*, 2016). We therefore predicted that extent  
570 of the damage to the hand area of the primary motor cortex, and to the white matter ROI  
571 that characterizes the most likely course of the CST (see Materials and Methods) would  
572 correlate more with Individuation, and less with Strength. Furthermore, lesions in these  
573 areas should correlate with individuation recovery over and above the level expected  
574 from the mean recovery function.

575         As hypothesized, the extent of involvement by the lesion of the cortical hand area  
576 correlated significantly with the Individuation Index at all time points. For the CST, all  
577 correlations were significant after week 1 (Fig. 5B-D). While both lesion measures also  
578 correlated with the Strength Index, these correlations were weaker (repeated-measures  
579 ANOVA showed a significant main effect for behavioral measure ( $F(1,3) = 146, p =$   
580  $0.001$ ). This difference was not due to measurement noise, as the Strength and  
581 Individuation Indices had comparable reliabilities. Furthermore, percent lesion  
582 involvement also significantly correlated with the Individuation Index, after accounting  
583 for the average Strength-Individuation relationship ( $p < 0.05$  for correlations after week  
584 24 for cortical hand area, and after week 12 for CST). Indeed, at W52, the correlations  
585 with the residuals were as high as with the Individuation Indices themselves ( $r = 0.61$  vs.  
586  $r = 0.57$  for the cortical hand area,  $r = 0.51$  vs.  $r = 0.54$  for the CST). Together these  
587 results suggest that Individuation recovery is most heavily determined by the sparing in  
588 the hand area of the primary motor cortex and of direct CST projections, while strength  
589 recovery may also depend on other spared descending pathways.

590

-----

591

Insert Figure 5

592

-----

593

594

## Discussion

595

596

597

598

599

600

601

602

603

604

605

606

607

608

609

610

611

612

613

In a large-scale longitudinal study, we tracked recovery of two independent behavioral components of hand function: strength and finger control. Patients were tested at five time points over a one-year period after stroke, using a novel paradigm that separately measures maximum voluntary contraction force (a measure of strength) and finger individuation ability (a measure of control), and crucially controls for any obligatory dependency between these two measures. This approach allowed us to determine how recovery of strength and control interrelate. Our main question was to ask whether there is a causal relationship between strength and control at the level of recovery mechanisms, after the two variables had been experimentally uncoupled. If they are truly dissociable, then hypothetically patients could show perfect control of individual fingers, even with significant weakness (except for complete hemiplegia, in which case no individuation measure would be obtainable).

We showed that involuntary movements in passive fingers (enslaving) increased with the level of force production of the active finger. This phenomenon is analogous to what Dewald and colleagues (Sukal *et al.*, 2007; Ellis *et al.*, 2009) have described for the paretic arm: a decrease in arm reaching workspace as the force requirement to resist gravity increases. We showed that the ratio of enslaving and active force can account for this dependency and thereby provides a sensitive measure of finger control independent of the level of force deficit.

614 We first examined the time courses of recovery for strength and individuation.  
615 Consistent with what has been described with traditional clinical scales (Duncan *et al.*,  
616 1992; Jørgensen *et al.*, 1995; Krakauer *et al.*, 2012), both measures showed most  
617 recovery over the first three months after stroke. This similarity between the time courses  
618 does not, however, necessarily imply that recovery of strength and individuation is  
619 dependent on a single underlying neural substrate or mechanism. It remains possible that  
620 recovery of these two components occurs in parallel because of commonalities in basic  
621 tissue repair mechanisms post-ischemia but they are nevertheless independent modules.  
622 Indeed, we found a small but robust difference in the time course of recovery of strength  
623 compared to control: finger strength showed a faster rate of change compared to  
624 individuation over the first month. This finding raises the interesting possibility that  
625 different neurological substrates underlie recovery of strength and individuation.

626 Closer examination of the two variables revealed a time-invariant non-linear  
627 relationship between strength and individuation in the paretic hand. This function has two  
628 distinct parts: individuation and strength were highly correlated below a strength  
629 threshold of ~60% of the non-paretic side; beyond this point, they were uncorrelated. The  
630 shape of this function remained the same across all time points. Recovery of hand  
631 function could be characterized as movement along this invariant function: patients with  
632 good recovery traveled further along the function, whereas patients with poor recovery  
633 remained in the first segment. The strong correlation between strength and individuation  
634 for severely impaired patients is consistent with a single system mediating recovery of  
635 both. Indeed, in our cohort there was no patient with relatively good strength but severe  
636 impairment of individuation, which also suggests that recovery of finger control



637 correlates with recovery of strength in patients with severe hemiparesis. However, two  
638 pieces of behavioral evidence suggest that strength and finger control might rely on  
639 partially separate mechanisms of recovery. First, a correlation between strength and  
640 individuation was absent for the subset of well-recovered patients – i.e. patients with a  
641 Strength Index above 60%. This breakdown in correlation cannot be attributed to a  
642 ceiling effect for Individuation. Secondly, analysis of the residuals around the mean  
643 recovery function revealed that patients differed consistently in the amount of their  
644 individuation recovery relative to the level predicted by their strength recovery. Notably,  
645 their positioning relative to the mean recovery curve seemed to be set early in the  
646 recovery process and then remained relatively stable at later time points.

647 -----  
648 Insert Figure 6  
649 -----

650 Thus we propose that recovery of strength and individuation relies on at least  
651 partially separate systems. One system primarily contributes strength, but also has some  
652 limited control capacity. The isolated contribution of this system would determine the  
653 lower bound of the data points in the strength-individuation plot (dashed line in Fig. 6):  
654 when a patient regains some strength, he or she automatically regains a limited amount of  
655 control with it. However, the amount of individuation is limited and does not increase  
656 above a certain level. This would explain both the strong correlation between strength  
657 and individuation for the severely impaired patients, and the fact that no patient occupied  
658 the lower right corner of strength-individuation space, i.e. no patients had good strength  
659 but minimal control.

660           The second system would then add additional control capacities to the first system  
661 (vertical arrows in Fig. 6). Patients with a strong contribution from this second system  
662 may gain full recovery of individuation; patients with no or only partial contribution from  
663 the second system may recover completely in strength, but not in individuation.  
664 Importantly the recovery of this second system also occurs early after stroke,  
665 subsequently a patient's relative position above or below the mean recovery function  
666 remains relatively fixed (Fig. 4D).

667           The lesion analysis adds support to the two-systems model for recovery suggested  
668 by the behavioral data. A wealth of evidence in humans and non-human primates  
669 implicates the role of CST in finger control, especially the monosynaptic cortico-  
670 motoneuronal connections originating from “new” M1 (Lawrence and Kuypers, 1968;  
671 Porter and Lemon, 1993; Rathelot and Strick, 2009). Notably, these connections do not  
672 generate high levels of force but rather finely graded forces riding on top of larger forces  
673 (Maier *et al.*, 1993). Consistent with this idea, lesions in the gray matter of the hand areas  
674 in M1- the main origin of corticospinal projections- as well as the CST, correlated more  
675 with impaired individuation than with strength.

676           In contrast, finger strength may rely on other neural pathways, including the  
677 reticulospinal tract (RST), which can support strength and gross movements (Buford and  
678 Davidson, 2004; Davidson and Buford, 2004). Although the RST has been found to  
679 participate in some degree of finger control, its functional range is limited and biased  
680 towards flexor muscles (Riddle *et al.*, 2009; Baker, 2011).

681           Recovery after stroke is likely to result from the dynamic interplay between the  
682 CST and other descending pathways, particularly the RST. In this scenario, the

683 correlation between strength and control at low levels of strength may represent the state  
684 of both the residual CST and of cortical projections to reticular nuclei in the brainstem. In  
685 this framework, recovery along the lower bound of the invariant function would represent  
686 the contribution of the RST and other non-CST descending pathways. Those patients  
687 with less damage to the CST would consistently ride above this function.

688         The dichotomy proposed here may be too simplistic. While the origin of the  
689 corticoreticular inputs is more diffuse (Keizer and Kuypers, 1989) and bi-laterally  
690 organized (Buford and Davidson, 2004; Sakai *et al.*, 2009; Soteropoulos *et al.*, 2012),  
691 many of the projections to the reticular formation arise from the primary motor cortex  
692 (Catsman-Berrevoets and Kuypers, 1976; Jones and Wise, 1977). Thus, our lesion ROIs  
693 will have included the corticoreticular tract to some degree, possibly explaining the  
694 lower, but nevertheless significant correlation with strength. Furthermore, it is very likely  
695 that direct corticospinal projections contribute to hand strength to some degree.

696         Interestingly, there was a small degree of impairment, especially in strength, in  
697 the hand ipsilesional to the stroke. This finding confirms previous reports of deficits in  
698 the non-paretic hand using clinical scales, e.g. muscle weakness measured by  
699 dynamometry (Colebatch and Gandevia, 1989), and dexterity measured with the Nine  
700 Hole Peg Test (9HPT) in (Noskin *et al.*, 2008). This ipsilesional impairment is consistent  
701 with positing a strength role for the RST because it projects bilaterally.

702         A limitation of the current study is that the paradigm is designed to assess  
703 weakness and enslaving in finger flexors, but not extensors. Because finger extensors  
704 play an important role in finger individuation, and have been particularly associated with  
705 the CST, it is possible that individuation in the extensors would also be more CST-

706 dependent and the dual systems we are implying for the flexor might not apply to the  
707 same degree.

708

## 709 **Conclusions**

710 Here we found that hand function after stroke can be partitioned into strength and  
711 strength-independent control. Most recovery of both these components occurred in the  
712 first three months after stroke, although strength continued to improve for up to six  
713 months. At any time point after stroke, strength and strength-independent control were  
714 related by an invariant curvilinear function: strength and some degree of control are  
715 correlated up to a certain strength level and then control saturates; some subjects showed  
716 additional improvement in individuation riding on top of the main recovery function. The  
717 results suggest that hand recovery is supported by two separable systems: one that mainly  
718 contributes to the generation of large forces, as in the power grip, and another that is  
719 responsible for more precise control of the digits at all levels of force. This behavioral  
720 and imaging evidence for two systems contributing to recovered hand function after  
721 stroke is consistent with the known characteristics of the CST and RST.

722

723

724

## References

- 725 Baker SN. The primate reticulospinal tract, hand function and functional recovery. *J.*  
726 *Physiol.* 2011; 589: 5603–5612.
- 727 Bates D, Mächler M, Bolker B, Walker S. Fitting Linear Mixed-Effects Models using  
728 *lme4*.
- 729 Brainard DH. The Psychophysics Toolbox. *Spat. Vis.* 1997; 10: 433–436.
- 730 Buford JA, Davidson AG. Movement-related and preparatory activity in the  
731 reticulospinal system of the monkey. *Exp. Brain Res.* 2004; 159: 284–300.
- 732 Catsman-Berrevoets CE, Kuypers HG. Cells of origin of cortical projections to dorsal  
733 column nuclei, spinal cord and bulbar medial reticular formation in the rhesus  
734 monkey. *Neurosci. Lett.* 1976; 3: 245–252.
- 735 Ceritoglu C, Oishi K, Li X, Chou M-C, Younes L, Albert M, et al. Multi-contrast large  
736 deformation diffeomorphic metric mapping for diffusion tensor imaging.  
737 *NeuroImage* 2009; 47: 618–627.
- 738 Colebatch JG, Gandevia SC. The Distribution of Muscular Weakness in Upper Motor  
739 Neuron Lesions Affecting the Arm. *Brain* 1989; 112: 749–763.
- 740 Dale AM, Fischl B, Sereno MI. Cortical surface-based analysis. I. Segmentation and  
741 surface reconstruction. *NeuroImage* 1999; 9: 179–194.
- 742 Davidson AG, Buford JA. Motor outputs from the primate reticular formation to shoulder  
743 muscles as revealed by stimulus-triggered averaging. *J. Neurophysiol.* 2004; 92:  
744 83–95.

- 745 Duncan PW, Goldstein LB, Matchar D, Divine GW, Feussner J. Measurement of motor  
746 recovery after stroke. Outcome assessment and sample size requirements. *Stroke*  
747 *J. Cereb. Circ.* 1992; 23: 1084–1089.
- 748 Ellis MD, Sukal-Moulton T, Dewald JPA. Progressive shoulder abduction loading is a  
749 crucial element of arm rehabilitation in chronic stroke. *Neurorehabil. Neural*  
750 *Repair* 2009; 23: 862–869.
- 751 Fischl B, Rajendran N, Busa E, Augustinack J, Hinds O, Yeo BTT, et al. Cortical folding  
752 patterns and predicting cytoarchitecture. *Cereb. Cortex N. Y. N* 1991 2008; 18:  
753 1973–1980.
- 754 Fisher RA. On the ‘Probable Error’ of a coefficient of correlation deduced from a small  
755 sample. *Metron* 1921: 1–32.
- 756 Fugl-Meyer AR, Jääskö L, Leyman I, Steglind S. The post-stroke hemiplegic patient. 1. a  
757 method for evaluation of physical performance. *Scand. J. Rehabil. Med.* 1975; 7:  
758 13–31.
- 759 Guttman L. A basis for analyzing test-retest reliability. *Psychometrika* 1945; 10: 255–  
760 282.
- 761 Heller A, Wade DT, Wood VA, Sunderland A, Hewer RL, Ward E. Arm function after  
762 stroke: measurement and recovery over the first three months. *J. Neurol.*  
763 *Neurosurg. Psychiatry* 1987; 50: 714–719.
- 764 Holland PW, Welsch RE. Robust regression using iteratively reweighted least-squares.  
765 *Commun. Stat. - Theory Methods* 1977; 6: 813–827.
- 766 Jones EG, Wise SP. Size, laminar and columnar distribution of efferent cells in the  
767 sensory-motor cortex of monkeys. *J. Comp. Neurol.* 1977; 175: 391–438.

- 768 Jørgensen HS, Nakayama H, Raaschou HO, Vive-Larsen J, Støier M, Olsen TS. Outcome  
769 and time course of recovery in stroke. Part II: Time course of recovery. The  
770 copenhagen stroke study. *Arch. Phys. Med. Rehabil.* 1995; 76: 406–412.
- 771 Kamper DG, Harvey RL, Suresh S, Rymer WZ. Relative contributions of neural  
772 mechanisms versus muscle mechanics in promoting finger extension deficits  
773 following stroke. *Muscle Nerve* 2003; 28: 309–318.
- 774 Kamper DG, Rymer WZ. Impairment of voluntary control of finger motion following  
775 stroke: role of inappropriate muscle coactivation. *Muscle Nerve* 2001; 24: 673–  
776 681.
- 777 Keizer K, Kuypers HG. Distribution of corticospinal neurons with collaterals to the lower  
778 brain stem reticular formation in monkey (*Macaca fascicularis*). *Exp. Brain Res.*  
779 1989; 74: 311–318.
- 780 Krakauer JW, Carmichael ST, Corbett D, Wittenberg GF. Getting neurorehabilitation  
781 right: what can be learned from animal models? *Neurorehabil. Neural Repair*  
782 2012; 26: 923–931.
- 783 Laird NM, Ware JH. Random-effects models for longitudinal data. *Biometrics* 1982; 38:  
784 963–974.
- 785 Lang CE, Schieber MH. Differential impairment of individuated finger movements in  
786 humans after damage to the motor cortex or the corticospinal tract. *J.*  
787 *Neurophysiol.* 2003; 90: 1160–1170.
- 788 Lang CE, Schieber MH. Reduced muscle selectivity during individuated finger  
789 movements in humans after damage to the motor cortex or corticospinal tract. *J.*  
790 *Neurophysiol.* 2004; 91: 1722–1733.

- 791 Li S, Latash ML, Yue GH, Siemionow V, Sahgal V. The effects of stroke and age on  
792 finger interaction in multi-finger force production tasks. *Clin. Neurophysiol. Off.*  
793 *J. Int. Fed. Clin. Neurophysiol.* 2003; 114: 1646–1655.
- 794 Li ZM, Latash ML, Zatsiorsky VM. Force sharing among fingers as a model of the  
795 redundancy problem. *Exp. Brain Res.* 1998; 119: 276–286.
- 796 Lyden PD, Lau GT. A critical appraisal of stroke evaluation and rating scales. *Stroke J.*  
797 *Cereb. Circ.* 1991; 22: 1345–1352.
- 798 Maier MA, Bennett KM, Hepp-Reymond MC, Lemon RN. Contribution of the monkey  
799 corticomotoneuronal system to the control of force in precision grip. *J.*  
800 *Neurophysiol.* 1993; 69: 772–785.
- 801 Mori S, Oishi K, Jiang H, Jiang L, Li X, Akhter K, et al. Stereotaxic white matter atlas  
802 based on diffusion tensor imaging in an ICBM template. *NeuroImage* 2008; 40:  
803 570–582.
- 804 Noskin O, Krakauer JW, Lazar RM, Festa JR, Handy C, O’Brien KA, et al. Ipsilateral  
805 motor dysfunction from unilateral stroke: implications for the functional  
806 neuroanatomy of hemiparesis. *J. Neurol. Neurosurg. Psychiatry* 2008; 79: 401–  
807 406.
- 808 Oishi K, Faria A, Jiang H, Li X, Akhter K, Zhang J, et al. Atlas-based whole brain white  
809 matter analysis using large deformation diffeomorphic metric mapping:  
810 application to normal elderly and Alzheimer’s disease participants. *NeuroImage*  
811 2009; 46: 486–499.
- 812 Oishi K, Faria AV, van Zijl PC, Mori S. MRI atlas of human white matter. Academic  
813 Press; 2010.



- 814 Oishi K, Zilles K, Amunts K, Faria A, Jiang H, Li X, et al. Human brain white matter  
815 atlas: identification and assignment of common anatomical structures in  
816 superficial white matter. *NeuroImage* 2008; 43: 447–457.
- 817 Oldfield RC. The assessment and analysis of handedness: the Edinburgh inventory.  
818 *Neuropsychologia* 1971; 9: 97–113.
- 819 Picard RR, Cook RD. Cross-Validation of Regression Models. *J. Am. Stat. Assoc.* 1984;  
820 79: 575–583.
- 821 Raghavan P, Krakauer JW, Gordon AM. Impaired anticipatory control of fingertip forces  
822 in patients with a pure motor or sensorimotor lacunar syndrome. *Brain* 2006; 129:  
823 1415–1425.
- 824 Rathelot J-A, Strick PL. Muscle representation in the macaque motor cortex: an  
825 anatomical perspective. *Proc. Natl. Acad. Sci. U. S. A.* 2006; 103: 8257–8262.
- 826 Rathelot J-A, Strick PL. Subdivisions of primary motor cortex based on cortico-  
827 motoneuronal cells. *Proc. Natl. Acad. Sci.* 2009; 106: 918–923.
- 828 Reinkensmeyer DJ, Lum PS, Lehman SL. Human control of a simple two-hand grasp.  
829 *Biol. Cybern.* 1992; 67: 553–564.
- 830 Riddle CN, Edgley SA, Baker SN. Direct and indirect connections with upper limb  
831 motoneurons from the primate reticulospinal tract. *J. Neurosci. Off. J. Soc.*  
832 *Neurosci.* 2009; 29: 4993–4999.
- 833 Sakai ST, Davidson AG, Buford JA. Reticulospinal neurons in the pontomedullary  
834 reticular formation of the monkey (*Macaca fascicularis*). *Neuroscience* 2009; 163:  
835 1158–1170.

- 836 Schieber MH. Individuated finger movements of rhesus monkeys: a means of quantifying  
837 the independence of the digits. *J. Neurophysiol.* 1991; 65: 1381–1391.
- 838 Sharpless JW. The nine hole peg test of finger hand coordination for the hemiplegic  
839 patient. *Mossmans Probl. Orientated Approach Stroke Rehabil.* 1982
- 840 Soteropoulos DS, Williams ER, Baker SN. Cells in the monkey ponto-medullary reticular  
841 formation modulate their activity with slow finger movements. *J. Physiol.* 2012;  
842 590: 4011–4027.
- 843 Sukal TM, Ellis MD, Dewald JPA. Shoulder abduction-induced reductions in reaching  
844 work area following hemiparetic stroke: neuroscientific implications. *Exp. Brain*  
845 *Res.* 2007; 183: 215–223.
- 846 Sunderland A, Tinson D, Bradley L, Hewer RL. Arm function after stroke. An evaluation  
847 of grip strength as a measure of recovery and a prognostic indicator. *J. Neurol.*  
848 *Neurosurg. Psychiatry* 1989; 52: 1267–1272.
- 849 Witham CL, Fisher KM, Edgley SA, Baker SN. Corticospinal Inputs to Primate  
850 Motoneurons Innervating the Forelimb from Two Divisions of Primary Motor  
851 Cortex and Area 3a. *J. Neurosci. Off. J. Soc. Neurosci.* 2016; 36: 2605–2616.
- 852 Yousry TA, Schmid UD, Alkadhi H, Schmidt D, Peraud A, Buettner A, et al.  
853 Localization of the motor hand area to a knob on the precentral gyrus. A new  
854 landmark. *Brain J. Neurol.* 1997; 120 ( Pt 1): 141–157.
- 855 Zatsiorsky VM, Li ZM, Latash ML. Enslaving effects in multi-finger force production.  
856 *Exp. Brain Res.* 2000; 131: 187–195.

857 Zhang Y, Zhang J, Oishi K, Faria AV, Jiang H, Li X, et al. Atlas-guided tract  
858 reconstruction for automated and comprehensive examination of the white matter  
859 anatomy. *NeuroImage* 2010; 52: 1289–1301.  
860  
861

862 **Table 1.** *Patient characteristics: age (years), sex, paretic side, initial FMA (Fugl-Meyer*  
863 *arm score, maximum 66), initial MoCA (Montreal Cognitive Assessment, maximum 30).*

864

865 **Table 2.** *Correlation between Strength Index, Individuation Index, FMA (Fugl-Meyer*  
866 *arm score, maximum 66), and ARAT (Action Reach Arm Test, maximum 57). All four*  
867 *measures are highly correlated; however Strength and Individuation Indices show the*  
868 *weaker correlation compared to that between FMA and ARAT.*

869

| Patient | Age at stroke | Gender | Paretic Side | Initial impairment (FMA) | Initial MoCA |
|---------|---------------|--------|--------------|--------------------------|--------------|
| 1       | 57            | M      | R            | 48                       | 27           |
| 2       | 24            | M      | L            | 35                       | 23           |
| 3       | 67            | F      | R            | 16                       | 23           |
| 4       | 74            | F      | R            | 39                       | 17           |
| 5       | 61            | F      | L            | 48                       | 26           |
| 6       | 59            | F      | R            | 60                       | 28           |
| 7       | 57            | M      | R            | 54                       | 27           |
| 8       | 66            | M      | L            | 65                       | 25           |
| 9       | 42            | F      | R            | 5                        | 18           |
| 10      | 65            | M      | L            | 30                       | 25           |
| 11      | 66            | F      | L            | 60                       | 19           |
| 12      | 51            | M      | L            | 34                       | 25           |
| 13      | 63            | F      | L            | 57                       | 26           |
| 14      | 55            | M      | L            | 0                        | 26           |
| 15      | 56            | M      | L            | 38                       | 25           |
| 16      | 56            | M      | L            | 64                       | 24           |
| 17      | 64            | F      | R            | 20                       | 16           |
| 18      | 60            | F      | R            | 55                       | 21           |
| 19      | 64            | M      | L            | 63                       | 25           |
| 20      | 25            | F      | L            | 42                       | 29           |
| 21      | 39            | F      | L            | 47                       | 20           |
| 22      | 46            | M      | L            | 9                        | 27           |
| 23      | 53            | F      | L            | 4                        | 29           |
| 24      | 66            | M      | L            | 59                       | 24           |
| 25      | 71            | M      | L            | 4                        | 26           |
| 26      | 52            | M      | L            | 53                       | 24           |
| 27      | 46            | M      | R            | 4                        | 21           |
| 28      | 46            | M      | L            | 49                       | 30           |
| 29      | 71            | M      | L            | 6                        | 24           |
| 30      | 47            | M      | R            | 57                       | 10           |
| 31      | 45            | M      | L            | 8                        | 27           |
| 32      | 55            | F      | L            | 19                       | 25           |
| 33      | 68            | F      | L            | 61                       | NaN          |
| 34      | 65            | M      | L            | 32                       | 28           |
| 35      | 51            | F      | L            | 63                       | 26           |
| 36      | 42            | M      | R            | 54                       | 25           |
| 37      | 58            | M      | L            | 4                        | 24           |
| 38      | 41            | F      | L            | 4                        | 23           |
| 39      | 35            | M      | L            | 4                        | 29           |
| 40      | 68            | M      | L            | 52                       | 27           |
| 41      | 76            | M      | L            | 53                       | 18           |

|    |    |   |   |    |    |
|----|----|---|---|----|----|
| 42 | 86 | M | L | 54 | 20 |
| 43 | 48 | M | L | 16 | 25 |
| 44 | 74 | M | R | 5  | 25 |
| 45 | 80 | F | R | 9  | 24 |
| 46 | 64 | F | L | 58 | 19 |
| 47 | 22 | M | R | 63 | 27 |
| 48 | 88 | F | R | 55 | 28 |
| 49 | 22 | M | R | 63 | 27 |
| 50 | 87 | F | R | 50 | 28 |
| 51 | 84 | M | R | 30 | 26 |
| 52 | 53 | M | R | 30 | 29 |
| 53 | 54 | M | L | 59 | 21 |
| 54 | 58 | M | R | 61 | 23 |

---

870

871

872

|                     | Strength Index | Individuation Index | FMA  | ARAT |
|---------------------|----------------|---------------------|------|------|
| Strength Index      |                | 0.73                | 0.76 | 0.74 |
| Individuation Index |                |                     | 0.68 | 0.72 |
| FMA                 |                |                     |      | 0.91 |

873

874 **Figure 1.** *Strength and Individuation task. (A) Ergonomic hand device. The participant's*  
875 *fingers are securely placed on the keys using Velcro straps. (B) Computer screen*  
876 *showing the instructional stimulus, which indicates both which finger to press and how*  
877 *much force to produce (height of the green bar). In the MVF task, maximal force was*  
878 *required; in the Individuation task a specific force level had to be reached. (C, D)*  
879 *Example trials from two healthy control participants during the Individuation task. Four*  
880 *trials are shown, one at 20% and one at 80% of MVF for the two participants. In this*  
881 *case the fourth finger (red) was the active finger. Note the higher level of enslaving of the*  
882 *passive fingers for higher active force level. (E) Mean deviation from baseline in the*  
883 *passive fingers plotted against the force generated by the active finger for (C) and (D).*  
884 *Increased enslaving with higher active force levels is clearly visible. The Individuation*  
885 *Index is the  $-\log(\text{slope})$  of the regression line between active force and passive mean*  
886 *deviation, measured as root mean square (RMS) force from baseline force produced by*  
887 *passive fingers.*

888

889 **Figure 2.** *Temporal profiles of recovery for strength and individuation. (A-B) Group*  
890 *recovery curves for the Strength and Individuation Indices for patients and controls.*  
891 *Asterisks indicate significant week-to-week change for the paretic hand (Bonferroni*  
892 *corrected p-values for each segments of Strength Index:  $p(W1-4) = 0.0045$ ,  $p(W4-12) =$*   
893  *$0.0082$ ,  $p(W12-24) = 0.068$ ,  $p(W24-52) = 0.87$ ; Individuation Index:  $p(W1-4) = 0.81$ ,*  
894  *$p(W4-12) = 0.0024$ ,  $p(W12-24) = 1.92$ ,  $p(W24-52) = 2.91$ ). (C) Rate of change (i.e.,*  
895 *change per week) in Z-normalized Strength and Individuation Indices during the first two*  
896 *intervals (Week 1 to 4 and Week 4 to 12). The two intervals show a significant interaction*



897 *between strength and individuation, indicating faster initial improvement of strength; (D)*  
898 *Week-to-week correlations between adjacent time points for the Strength and*  
899 *Individuation Indices. Dashed lines are the noise ceilings based on the within-session*  
900 *split-half reliabilities.*

901

902 **Figure 3.** *Temporal recovery profiles measures with clinical assessments. (A) Fugl-*  
903 *Meyer for the arm (FMA) and (B) hand (FMH); (C) ARAT; (D-F) strength for hand grip,*  
904 *FDI, and FCR muscles, as measured by Dynamometry. All measures showed significant*  
905 *change over time for the paretic hand. FMA:  $\chi^2 = 37.73, p = 8.13 \times 10^{-10}$ ; FMH:  $\chi^2 =$*   
906 *29.03,  $p = 7.14 \times 10^{-8}$ ; ARAT:  $\chi^2 = 36.33, p = 1.67 \times 10^{-9}$ ; grip:  $\chi^2 = 33.02, p = 9.21 \times 10^{-9}$ ;*  
907 *FDI:  $\chi^2 = 19.21, p = 1.67 \times 10^{-5}$ ; FCR:  $\chi^2 = 28.47, p = 9.50 \times 10^{-8}$ .*

908

909 **Figure 4.** *Time-invariant impairment function relating strength and control. (A) Scatter*  
910 *plots for Individuation against Strength Indices at each time point. Each black dot is one*  
911 *patient's data; blue dots and ellipse indicates the mean and standard error for controls at*  
912 *the time point. Two patients' data are highlighted: one with good recovery (yellow dot)*  
913 *and one with poor recovery (red dot). (B) Scatter plot with data from all time points*  
914 *superimposed with the best fitting two-segment piecewise-linear function with one*  
915 *inflection point at Strength Index = 0.607. (C) Residuals from each week subtracting out*  
916 *the mean impairment function (B, red line). The tendency of the residuals to stay above*  
917 *or below the typical Strength-Individuation relationship indicates that there are stable*  
918 *factors that determine Individuation recovery over and above strength recovery. (D)*  
919 *Correlations of residuals from (C) across adjacent time points increased over time*

920 *(Bonferroni corrected  $p(W1-4) = 2.12$ ,  $p(W4-12) = 0.00064$ ,  $p(W12-24) = 0.0024$ ,*  
921  *$p(W24-52) = p = 3.39 \times 10^{-6}$  ). Dashed line is the noise ceilings based on the within-*  
922 *session split-half reliabilities.*

923

924 **Figure 5.** *Lesion distribution and correlation with behavior. (A) Averaged lesion*  
925 *distribution mapped to JHU-MNI space (see Materials and Methods), with lesion flipped*  
926 *to one hemisphere. Color bar indicates patient count. (B) Correlation of behavior*  
927 *measures (Strength and Individuation Indices) at each time point with the percentage of*  
928 *damaged cortical gray matter within the M1 hand area ROI, corticospinal tract (CST).*  
929 *(D) Mean of week-by-week correlations between the two behavior measures and percent*  
930 *lesion volume measures for the cortical gray matter hand area and CST ROI. Black*  
931 *asterisks indicate significant correlations (tested against zero), and red asterisks indicate*  
932 *a significant difference between the correlation for Strength and Individuation for each*  
933 *week ( $p < 0.005$ ).*

934

935 **Figure 6.** *A schematic diagram of the hypothesis of two recovery systems. The first*  
936 *system (basic strength recovery) underlies strength recovery and a restricted amount of*  
937 *individuation recovery. This system therefore defines the lower bound (dashed line) of the*  
938 *space occupied by recovering patients (gray cloud). A second system (additional*  
939 *individuation recovery) adds further individuation abilities on top of the basic strength*  
940 *recovery.*

941

942

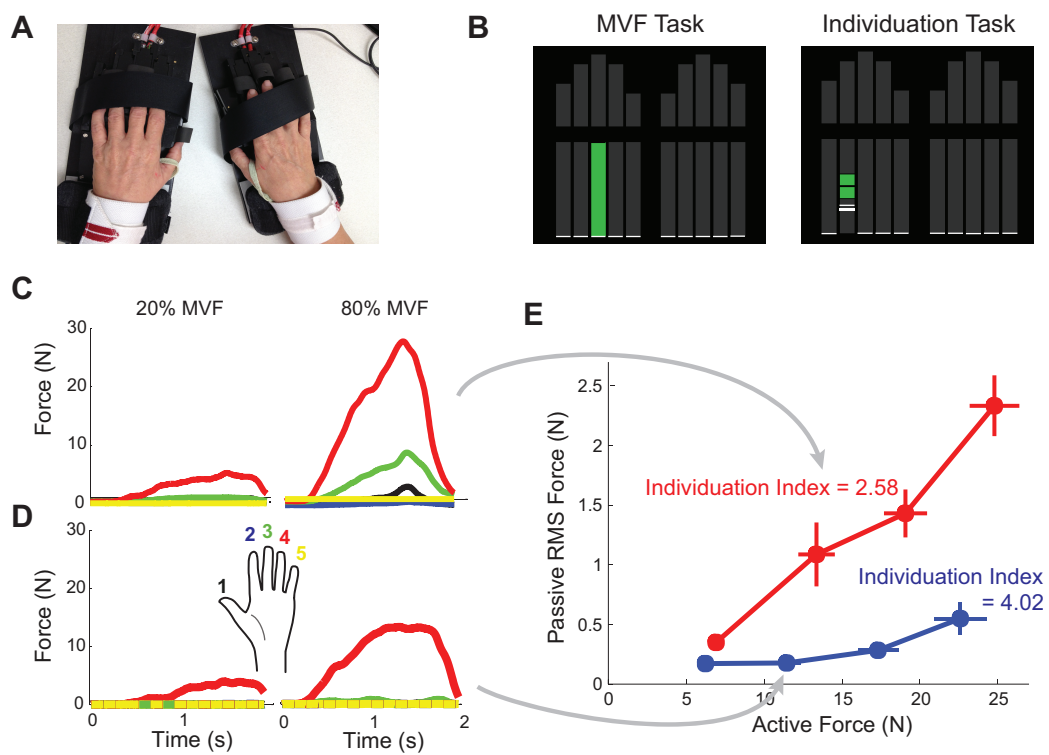

943

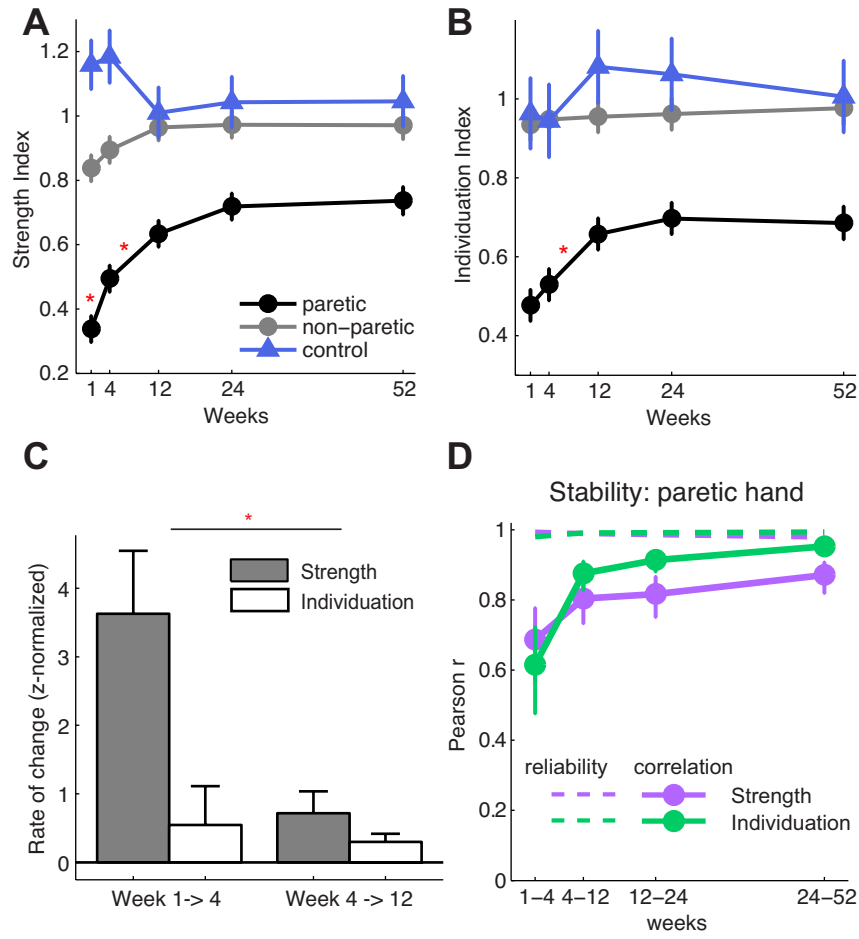

944

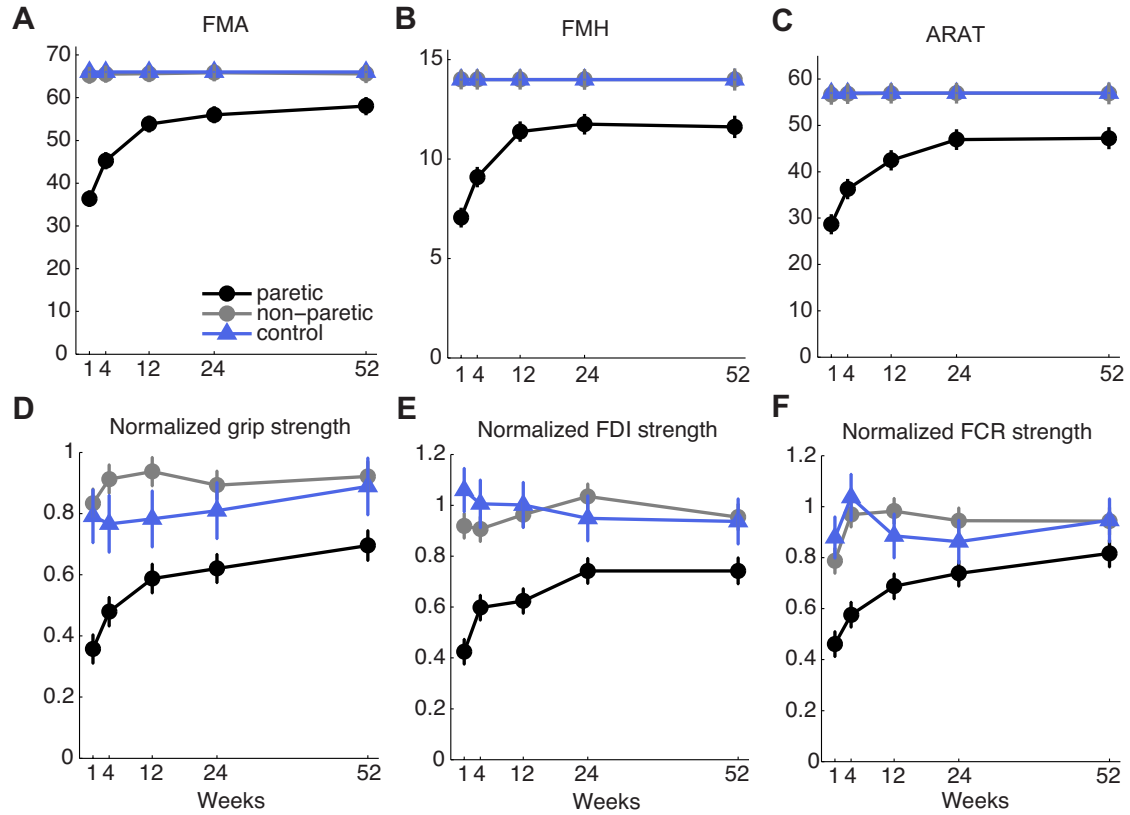

945

946

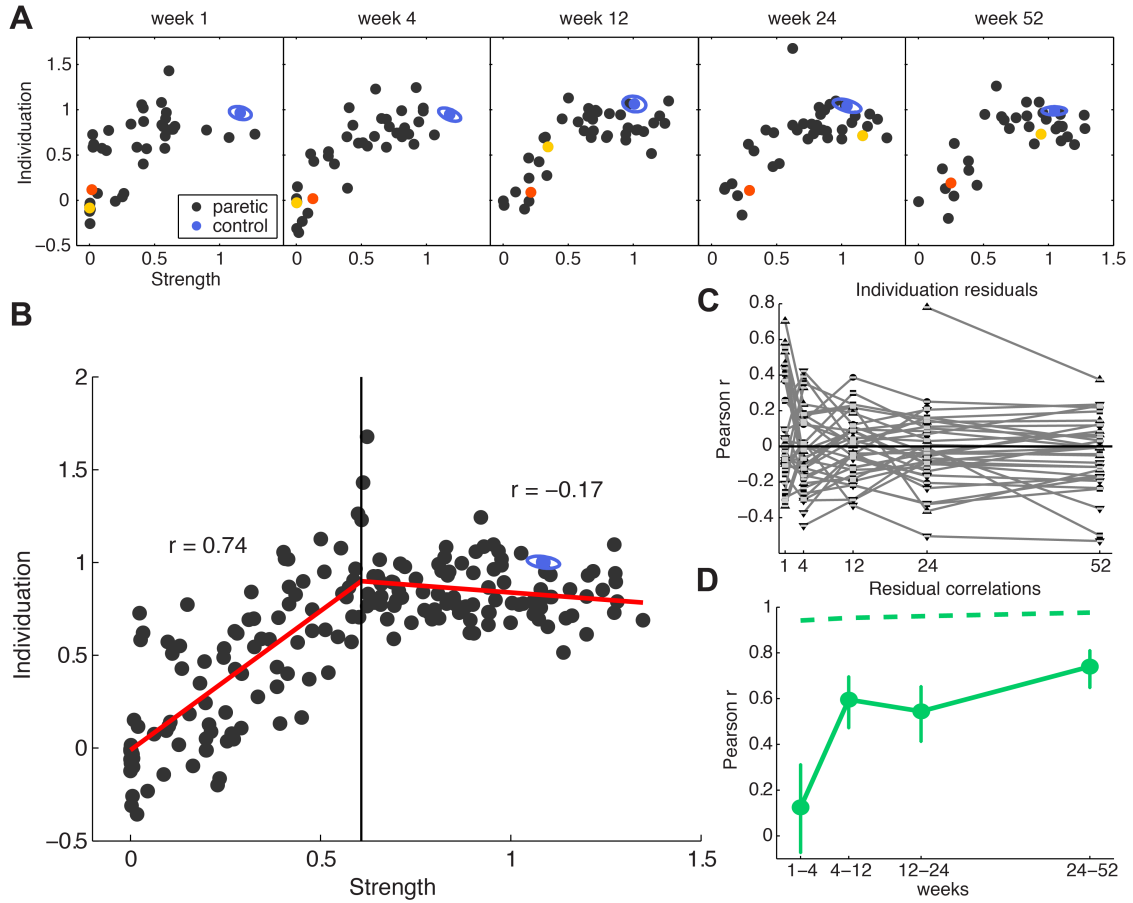

947

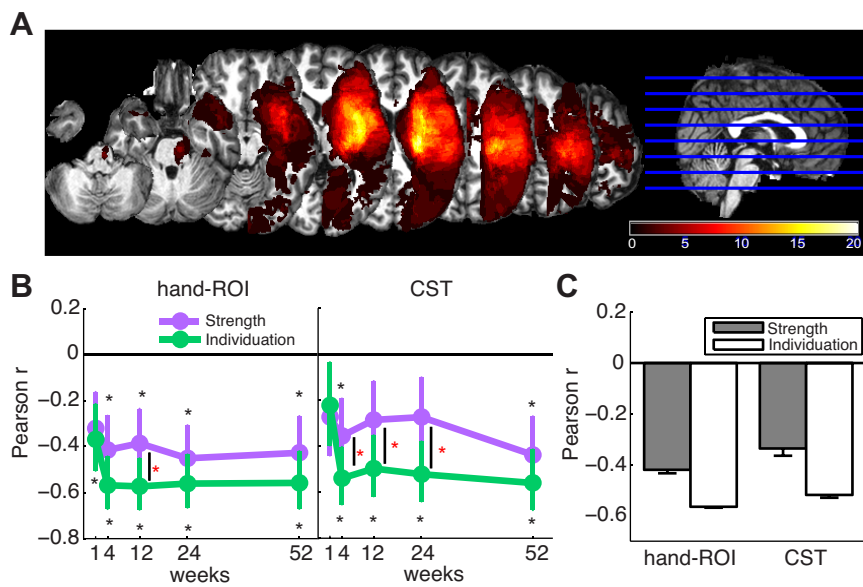

948

949

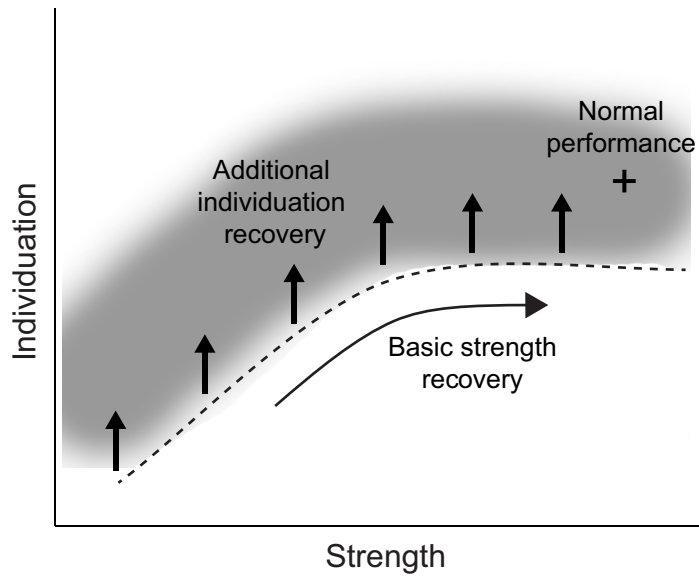

950
